# Supplementary material for: Assessment of human leukocyte antigen-based neoantigen presentation to determine pan-cancer response to immunotherapy
Source: PubMed Central journal article supplement (PMC10853168; doi:10.1038/s41467-024-45361-5), 2024-02-08
Supplement: 41467_2024_45361_MOESM1_ESM.pdf [file 41467_2024_45361_MOESM1_ESM.pdf]

1 **SUPPLEMENTARY INFORMATION**

2 Supplementary Figure 1. HLA and TNB between homozygotes and heterozygotes.

3 Supplementary Figure 2. Distribution of HLA-I divergence, TNB, and  $\log_{10}(\text{TNB}+1)$ .

4 Supplementary Figure 3. Distribution of HLA-I Antigen Presentation Score (HAPS) values in  
5 each cohort.

6 Supplementary Figure 4. Median value of the HLA-I Antigen Presentation Score (HAPS) in all  
7 immune checkpoint inhibitor (ICI)-treated patients.

8 Supplementary Figure 5. In vitro validation of functional T cells stimulated by predicted  
9 neoantigens.

10 Supplementary Figure 6. Efficacy of the HLA-I Antigen Presentation Score (HAPS) in  
11 predicting overall survival (OS) with immune checkpoint inhibitors (ICIs) in each cohort.

12 Supplementary Figure 7. Comparison of predictive value of HLA-I Antigen Presentation Score  
13 (HAPS) based on NetMHCpan4.0 and NetMHCpan4.1

14 Supplementary Figure 8. Single Cox regression analysis in ICI-treated patients.

15 Supplementary Figure 9. Correlation of TNB & HAPS with tumor stage.

16 Supplementary Figure 10. Efficacy of the HLA-I Antigen Presentation Score (HAPS) compared  
17 with TNB and HLA divergence in predicting overall survival (OS) with immune checkpoint  
18 inhibitors (ICIs) in NSCLC and SKCM

19 Supplementary Figure 11. Relationship between HLA-I Antigen Presentation Score (HAPS) and  
20 treatment response.

21 Supplementary Figure 12. Relationship between HLA-I Antigen Presentation Score (HAPS) and  
22 tumor mutation burden/programmed death ligand 1 (TMB/PD-L1).

23 Supplementary Figure 13. TMB/TNB based on the gene panel and whole-exome sequencing  
24 (WES).

25 Supplementary Figure 14. Patients stratified according to loss of heterozygosity (LOH) and  
26 HLA-I Antigen Presentation Score (HAPS) in each cohort.

27 Supplementary Figure 15. Immune cell subsets analyzed via single-sample gene set enrichment  
28 analysis (ssGSEA) based on RNA-seq data

29 Supplementary Figure 16. Relationship between HLA-I Antigen Presentation Score (HAPS) and  
30 dynamic evolution of the TCR repertoire.

31 Supplementary Figure 17. Varied predictive values of nine factors for individual patient.

32 Supplementary Figure 18. The architecture of the neural network model.

33 Supplementary Figure 19. Clinical responses of individuals predicted by a neural network model.

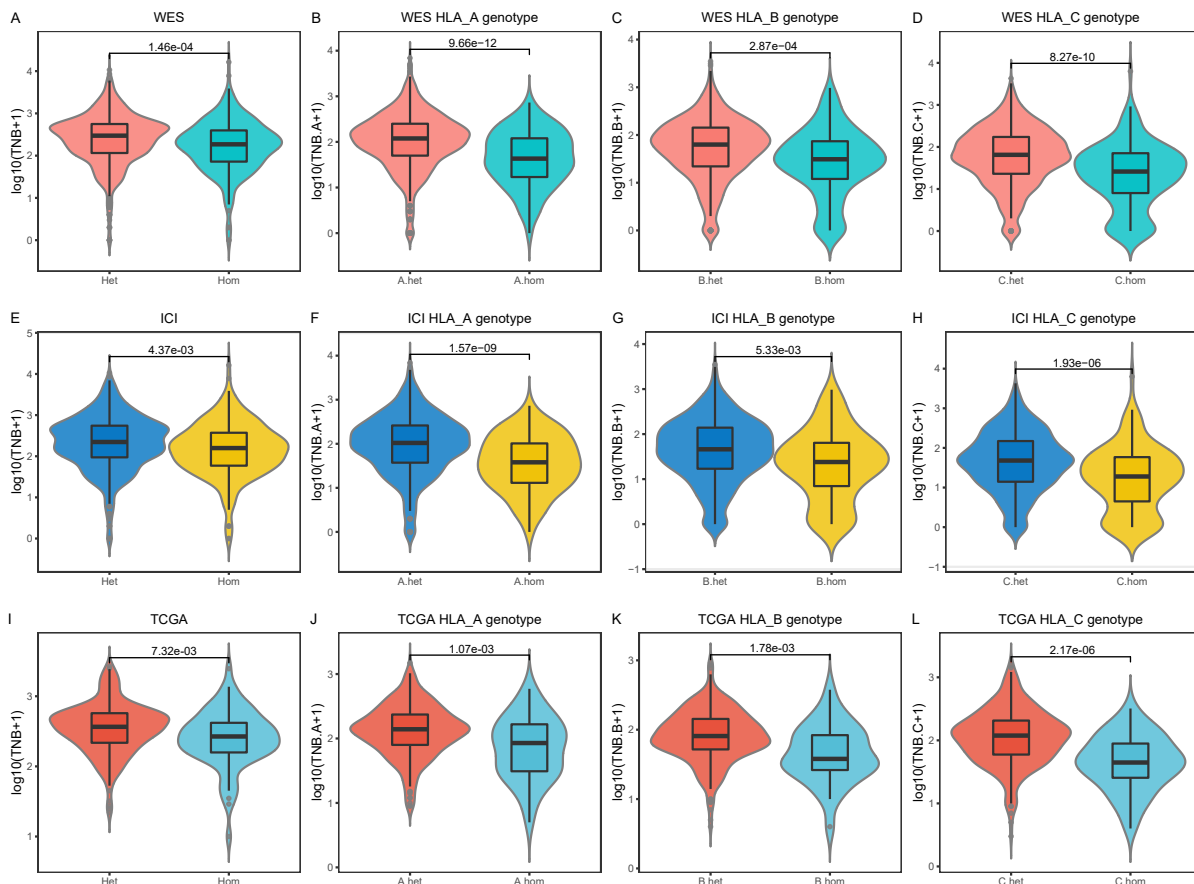

34

35 Het, heterozygotes. Hom, homozygotes. WES, whole-exome sequencing. ICI, immune checkpoint inhibitors.

36 **Supplementary Figure 1. TNB between homozygotes and heterozygotes**

37 Left: Distribution of TNB for each *HLA* genotype (left) and  $\log_{10}(\text{TNB}+1)$  (right) between  
 38 homozygotes and heterozygotes across all patients (N=1,125) (10 immune checkpoint inhibitor-  
 39 treated cohorts and The Cancer Genome Atlas database, respectively). Source data are provided  
 40 as a Source Data file.

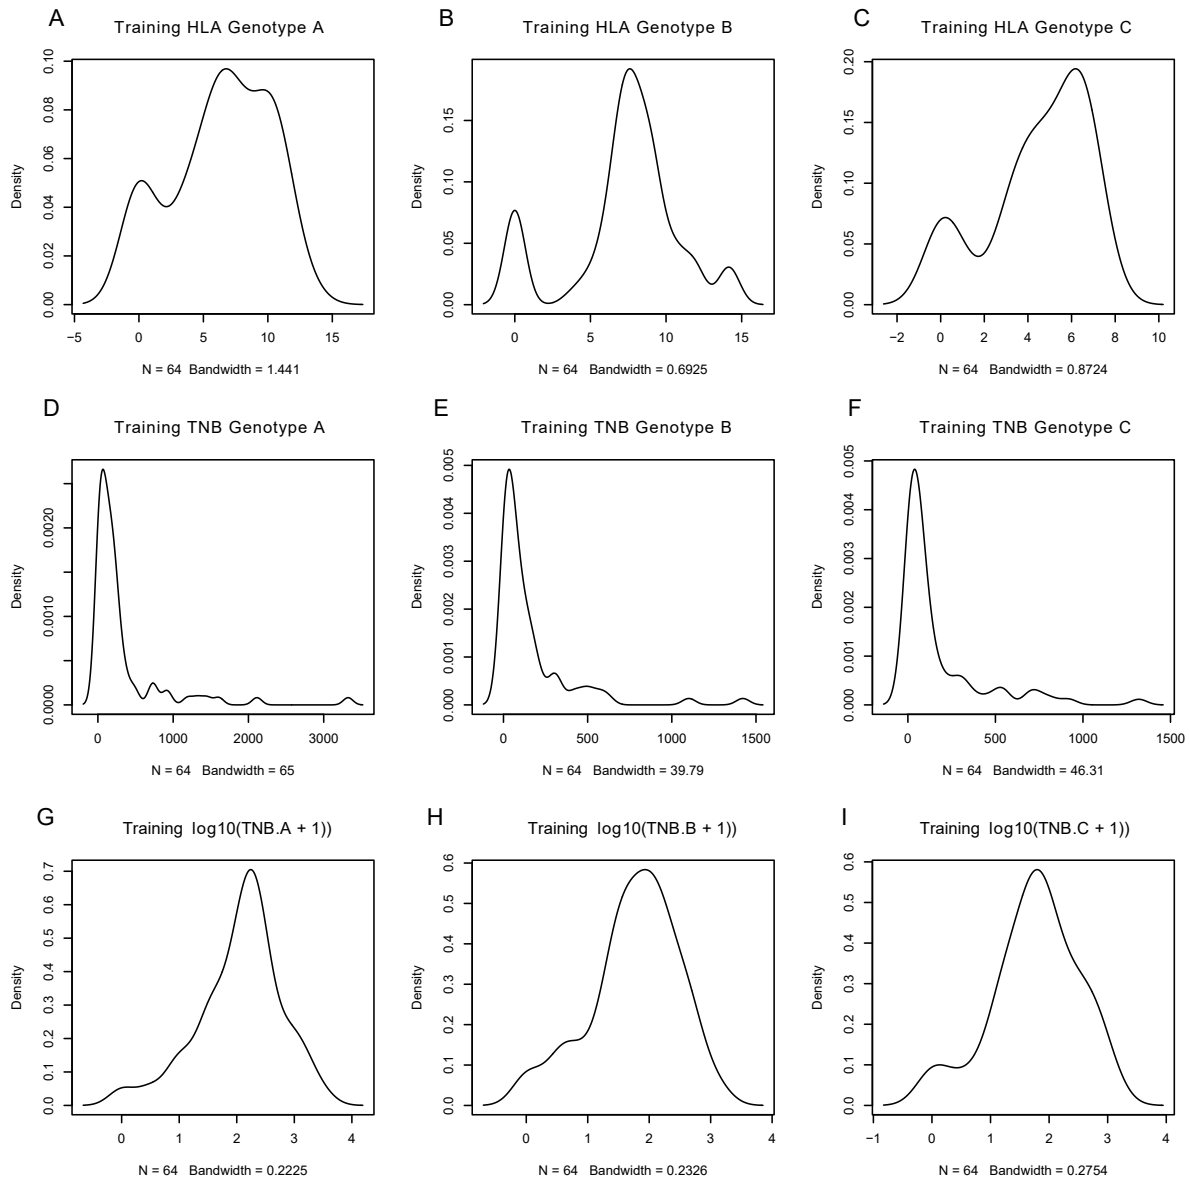

41

42 **Supplementary Figure 2. Distribution of *HLA-I* divergence, TNB, and  $\log_{10}(\text{TNB}+1)$ .**

43 Distribution of *HLA-I* divergence, TNB, and  $\log_{10}(\text{TNB}+1)$  among *HLA* genotypes in the

44 training set (N=64). Source data are provided as a Source Data file.

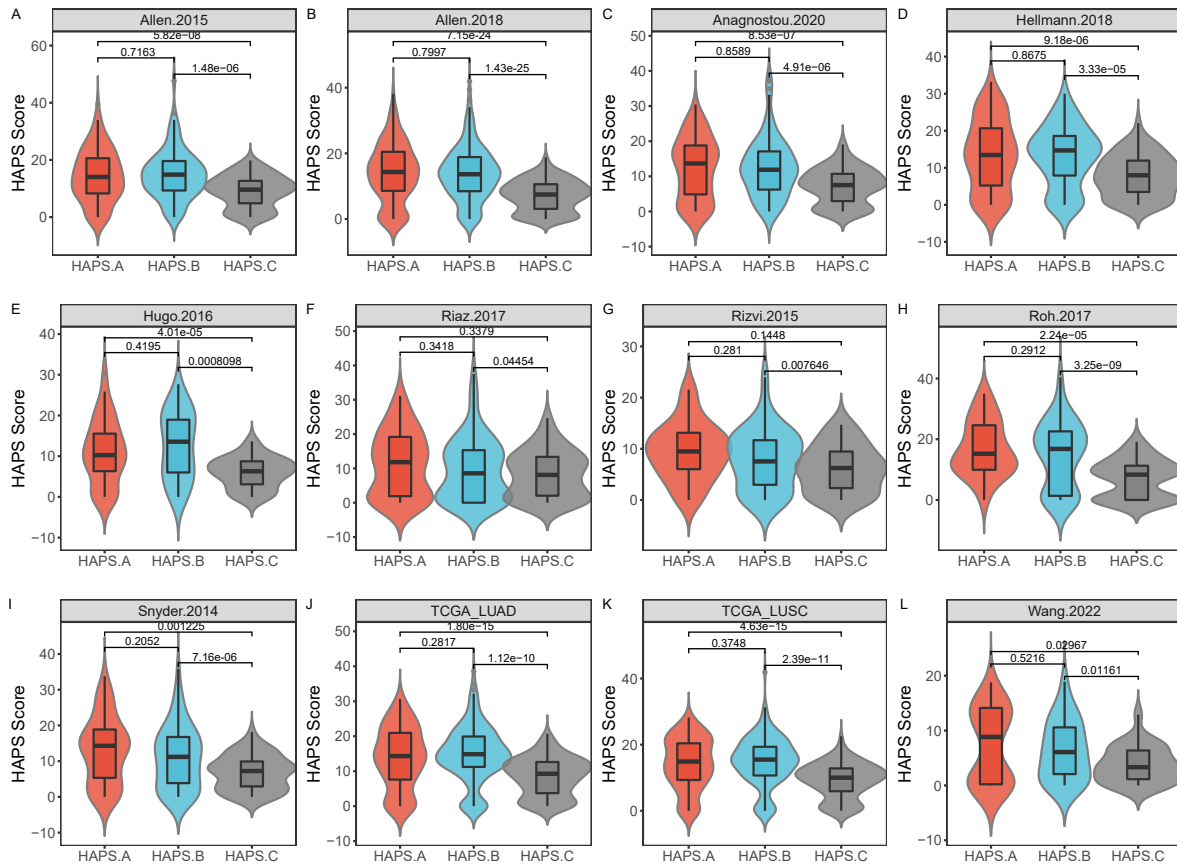

45

46 **Supplementary Figure 3. Distribution of *HLA-I* Antigen Presentation Score (HAPS) values**

47 **in each cohort**

48 Distribution of HAPS among *HLA* genotypes in 12 cohorts with whole-exome sequencing data

49 (N=1125). Source data are provided as a Source Data file.

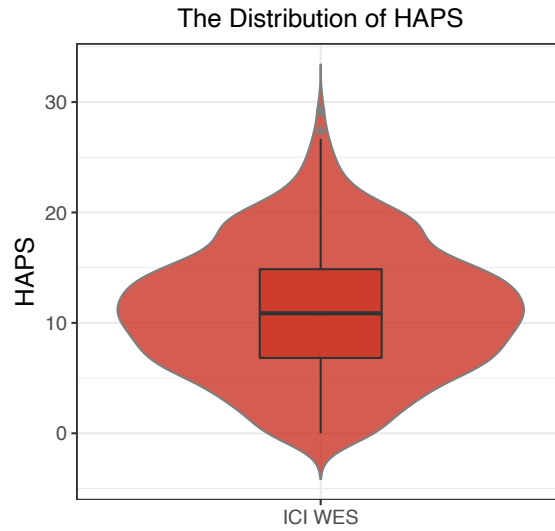

50

51 **Supplementary Figure 4. Median value of the *HLA-I* Antigen Presentation Score (HAPS) in**  
52 **all immune checkpoint inhibitor (ICI)-treated patients**

53 Distribution and median value of the HAPS in ICI-treated patients (N=792). Source data are  
54 provided as a Source Data file.

**A**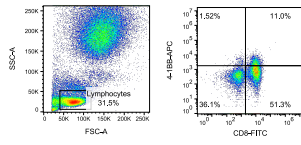**B**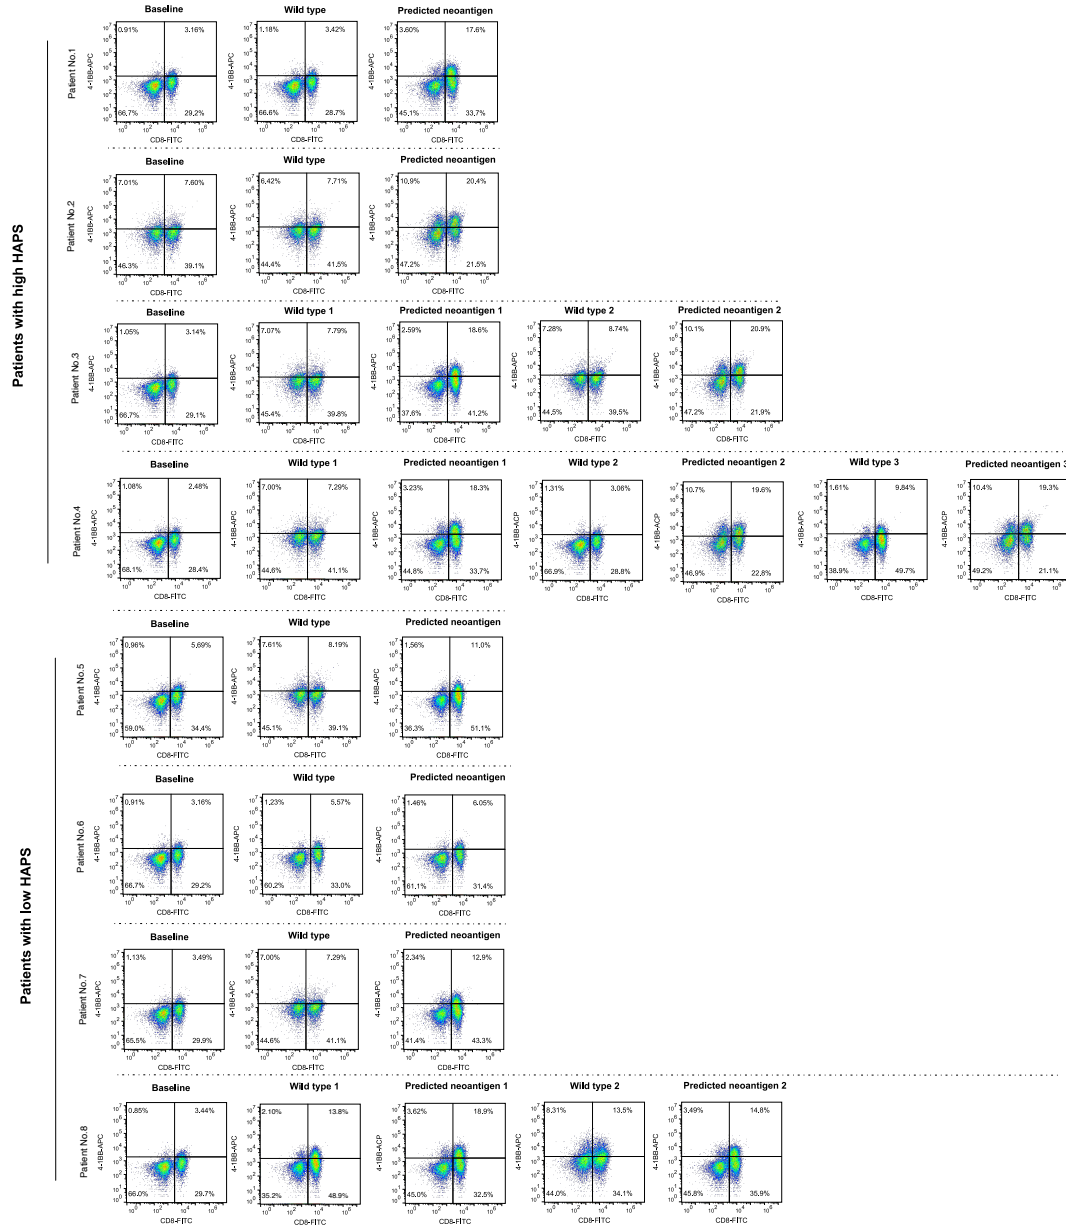**C**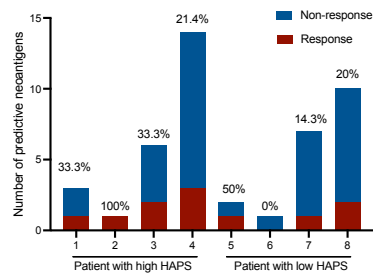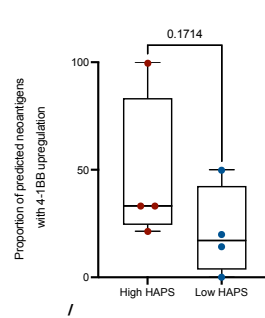**D**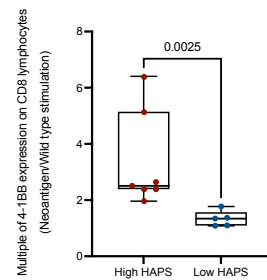

56 **Supplementary Figure 5. In vitro validation of functional T cells stimulated by predicted**  
57 **neoantigens**

58 A. Gating strategies for 4-1BB on CD8+ lymphocytes. B. Flow cytometry analysis for the  
59 expression of 4-1BB on CD8+ lymphocytes after co-culture with predicted neoantigens or wild-  
60 type counterparts in patients with high (upper) and low HAPS (lower). C. Proportion of predicted  
61 neoantigens leading to up-regulation of 4-1BB on CD8+ T cells in different groups. D. Higher  
62 activation of 4-1BB on CD8+ lymphocytes stimulated by predicted neoantigens in the high  
63 HAPS group than in the low HAPS group.



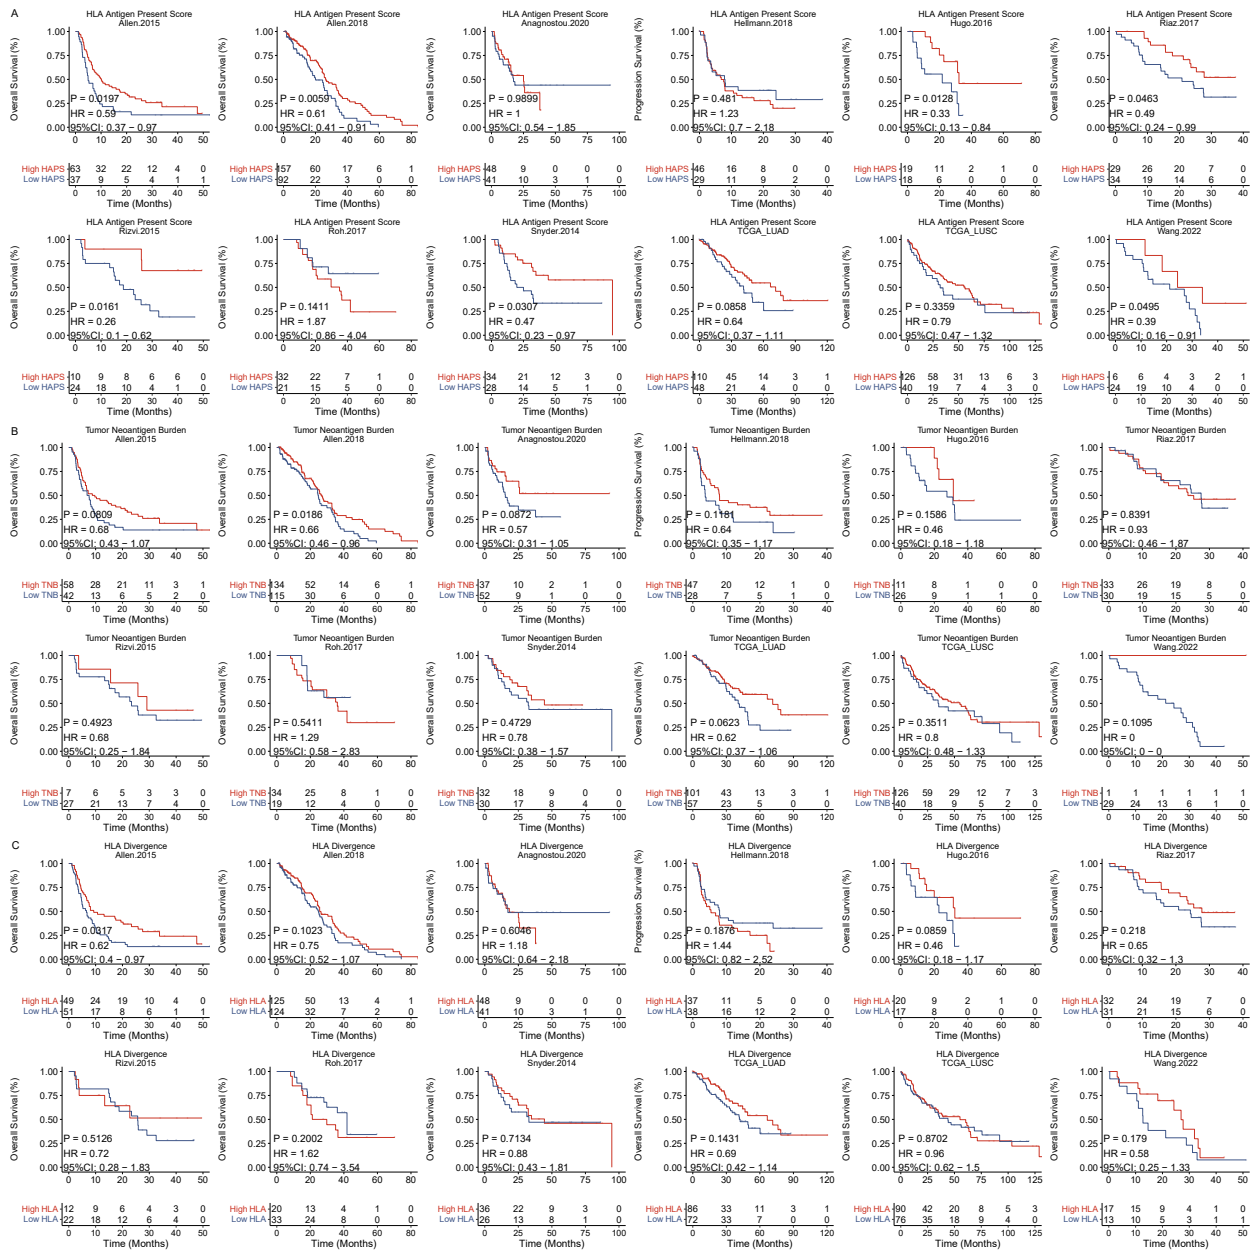

65

66 **Supplementary Figure 6. Efficacy of the *HLA-I* Antigen Presentation Score (HAPS)**

67 **compared with TNB and HLA divergence in predicting overall survival (OS) with immune**

68 **checkpoint inhibitors (ICIs) in each cohort**

- 69 Association of high HAPS (A), HLA divergence (B), and TNB (C) with OS after receiving ICIs
- 70 in 12 cohorts with whole-exome sequencing data. Source data are provided as a Source Data file.

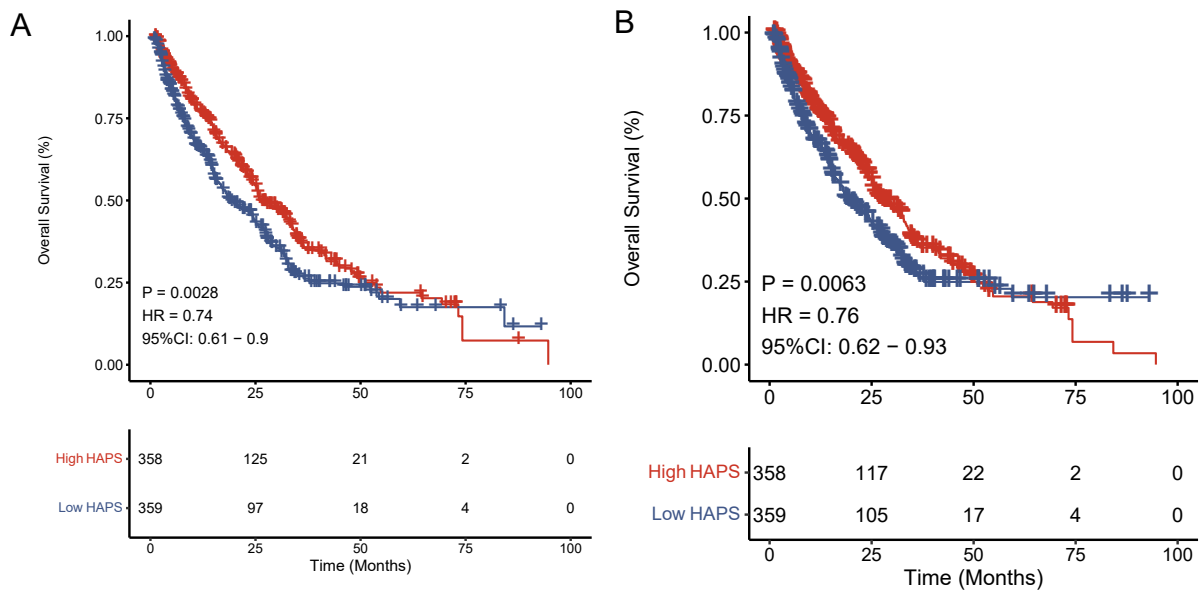

71

72 **Supplementary Figure 7. Comparison of predictive value of HLA-I Antigen Presentation**

73 **Score (HAPS) based on NetMHCpan4.0 and NetMHCpan4.1**

74 Overall survival of immune checkpoint inhibitor (ICI) stratified by HAPS based on IC50

75 (NetMHCpan4.0) (A) and rank 1% (NetMHCpan4.1) (B). Source data are provided as a Source

76 Data file.

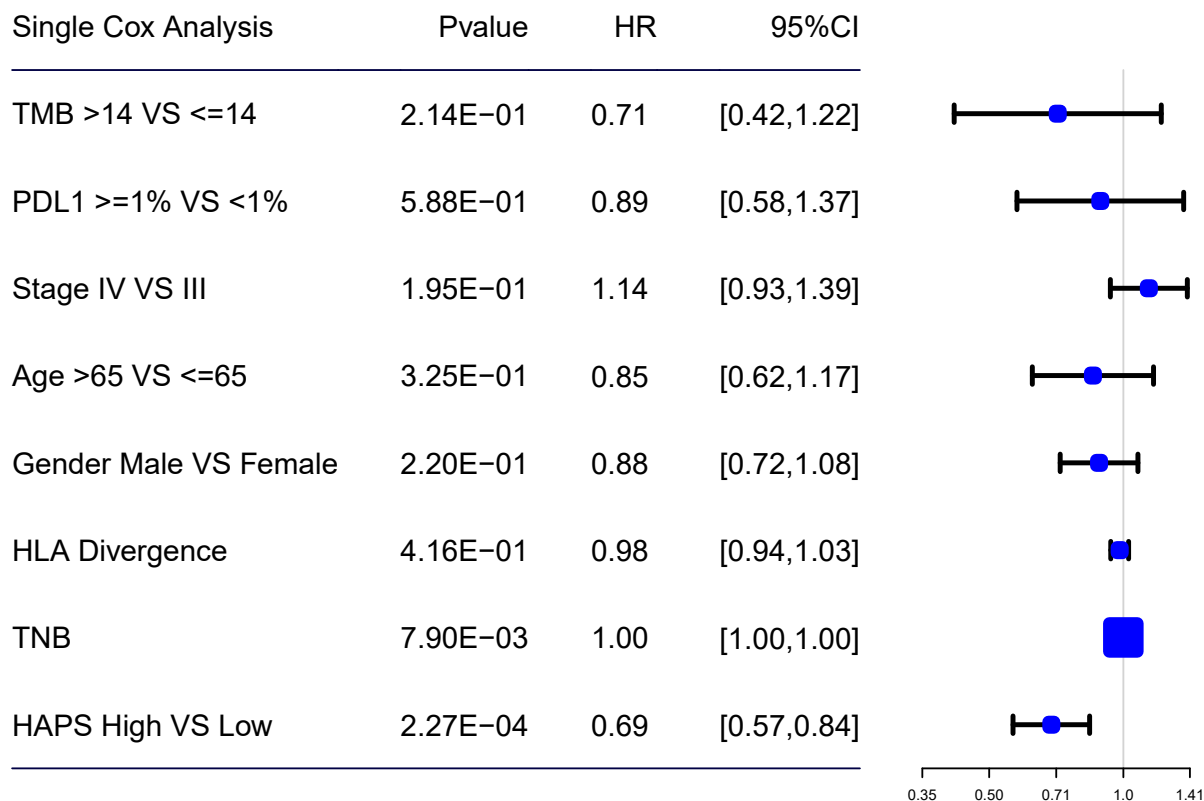

77

78 **Supplementary Figure 8. Single Cox regression analysis in ICI-treated patients**

79 The single Cox regression analysis of tumor mutation burden, programmed death ligand 1, age,  
 80 gender, HLA divergence, TNB, and *HLA-I* Antigen Presentation Score in ICI-treated patients

81 (N=717). Source data are provided as a Source Data file.

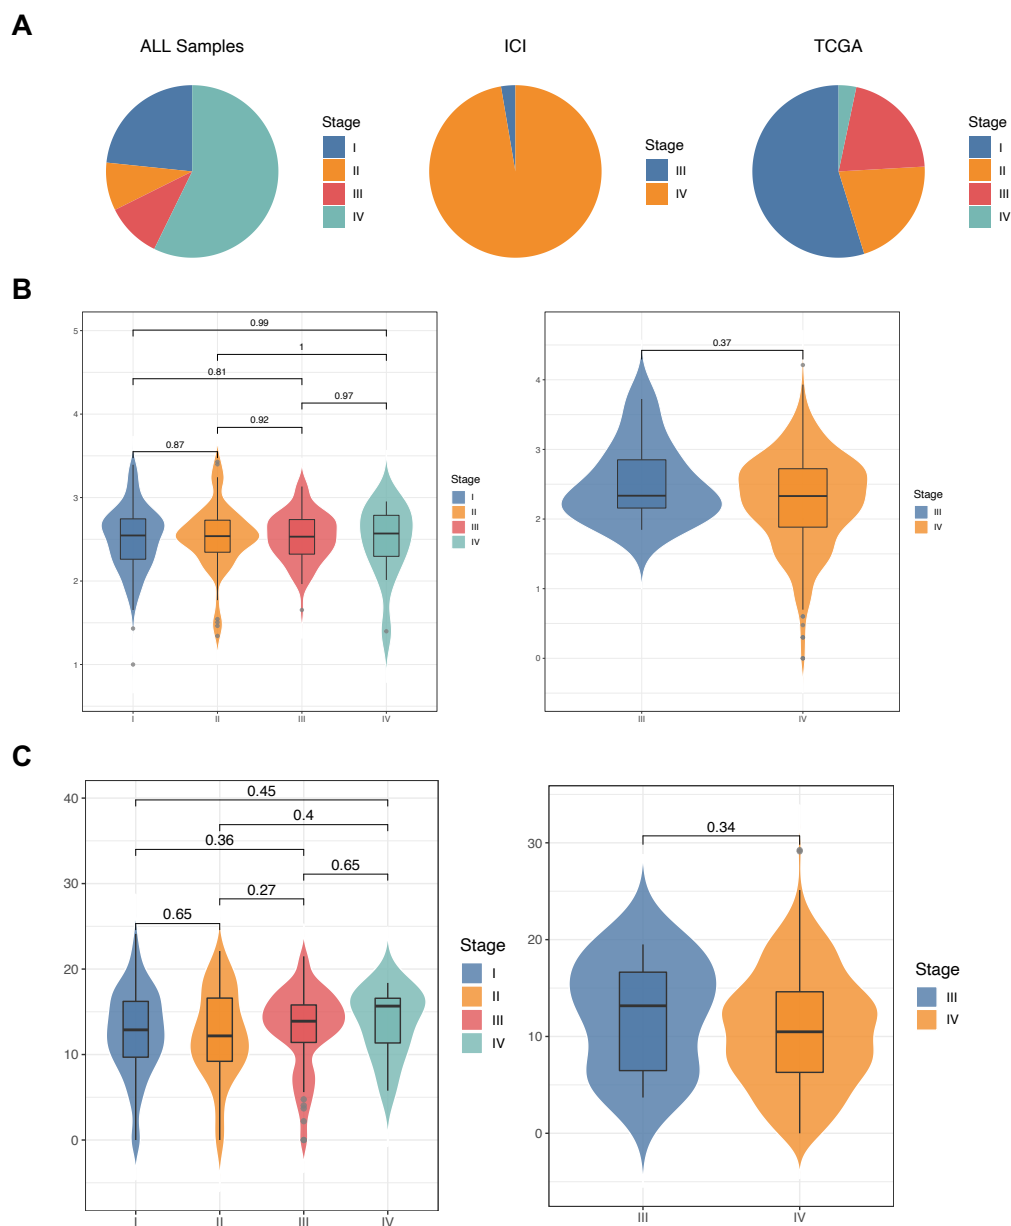

82

83 **Supplementary Figure 9. Correlation of TNB & HAPS with tumor stage.**

84 A. Distribution of tumor stage in ICI and TCGA cohort (N=779). C. Distribution of TNB

85 according to tumor stage; B. Distribution of TNB according to tumor stage in TCGA (left) or ICI

86 (cohort); C. Distribution of HAPS according to tumor stage in TCGA (left) or ICI (cohort).

87 Source data are provided as a Source Data file.

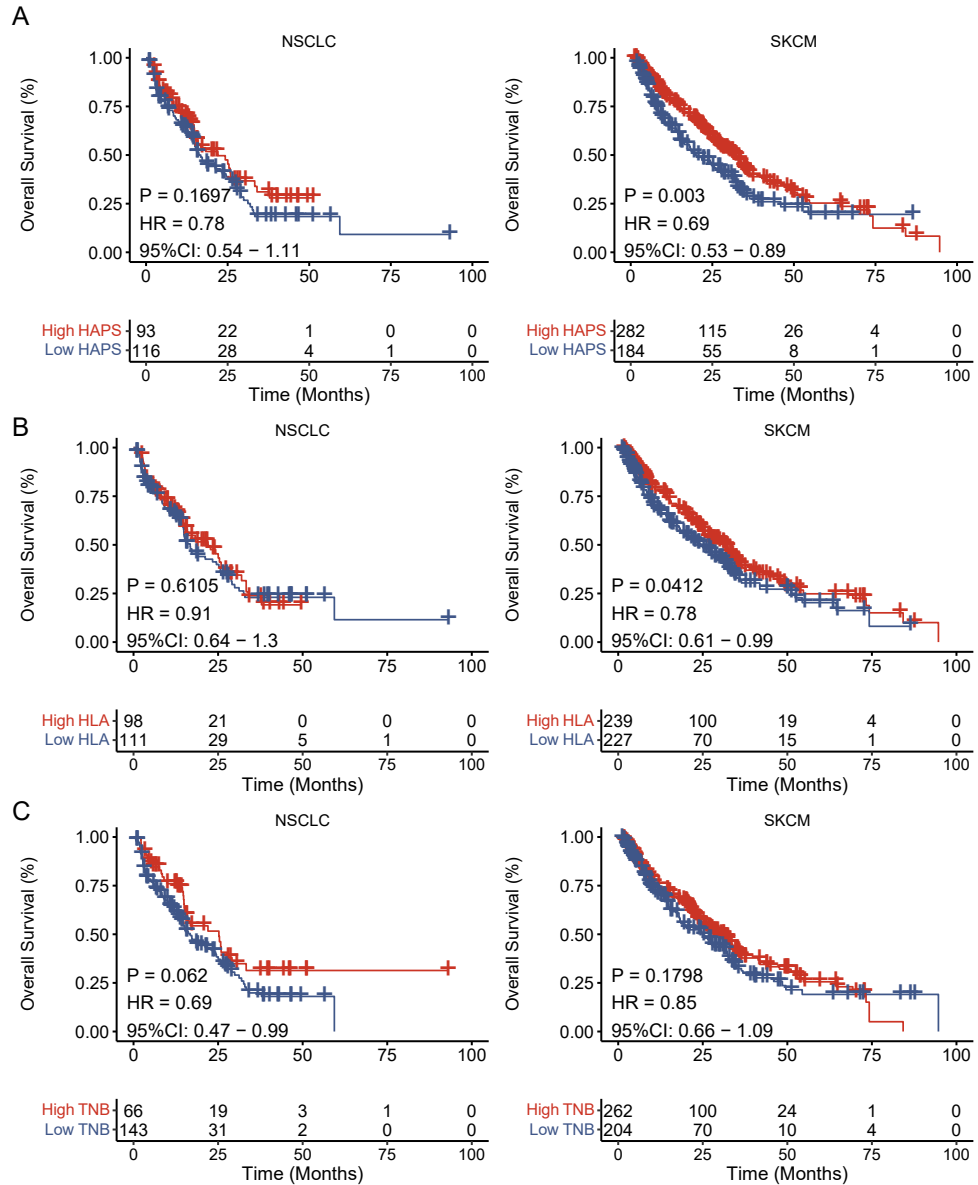

88

89 **Supplementary Figure 10. Efficacy of the *HLA-I* Antigen Presentation Score (HAPS)**

90 **compared with TNB and HLA divergence in predicting overall survival (OS) with immune**

91 **checkpoint inhibitors (ICIs) in NSCLC and SKCM**

92 Association of high HAPS (A), HLA divergence (B), and TNB (C) with OS after receiving ICIs

93 in NSCLC and SKCM. Source data are provided as a Source Data file.

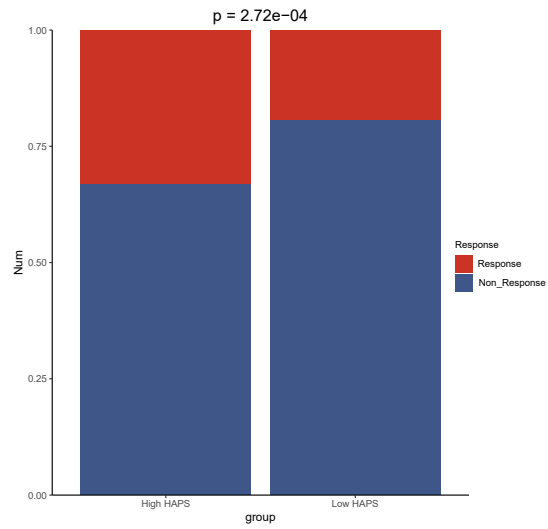

94

95 **Supplementary Figure 11. Relationship between *HLA-I* Antigen Presentation Score**

96 **(HAPS) and treatment response**

97 Statistically significant differences in response rate between high and low HAPS subgroups

98 (N=562). Source data are provided as a Source Data file.

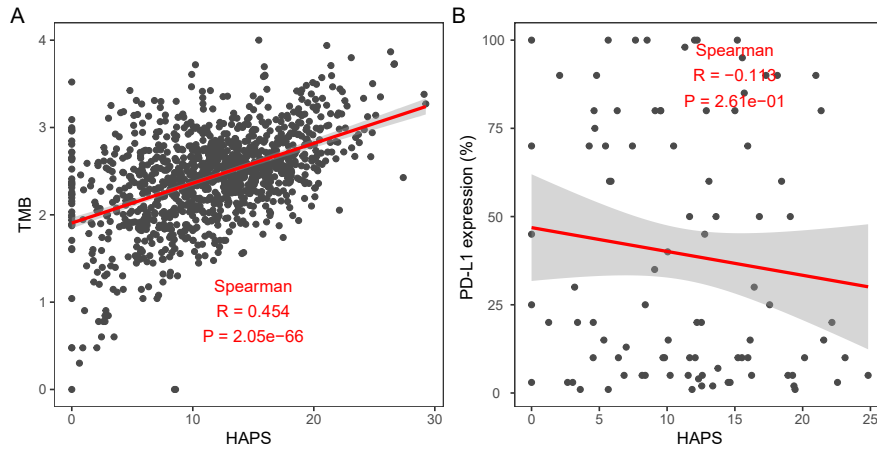

99

100 **Supplementary Figure 12. Relationship between *HLA-I* Antigen Presentation Score**

101 **(HAPS) and tumor mutation burden/programmed death ligand 1 (TMB/PD-L1)**

102 Relationship between HAPS and TMB (left)/PD-L1(right) (N=1125). Source data are provided

103 as a Source Data file.



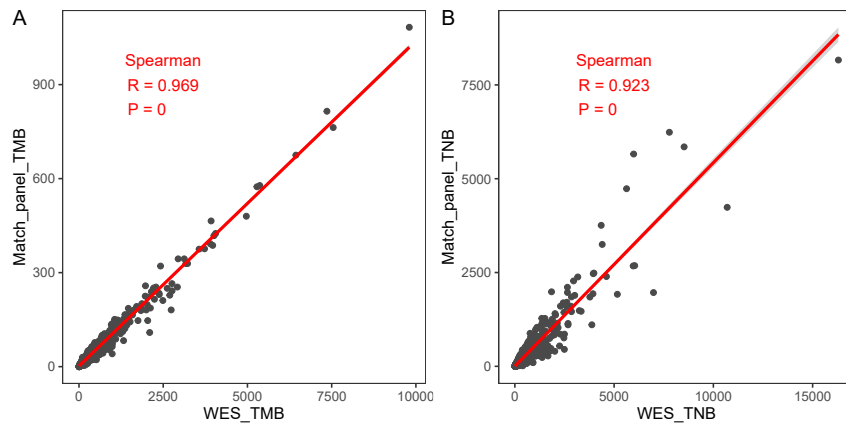

104

105 **Supplementary Figure 13. TMB/TNB based on the gene panel and whole-exome**

106 **sequencing (WES).**

107 Left: the relationship between panel- and WES-based TMB. Right: the relationship between

108 panel- and WES- based TNB (N=1125). Source data are provided as a Source Data file.

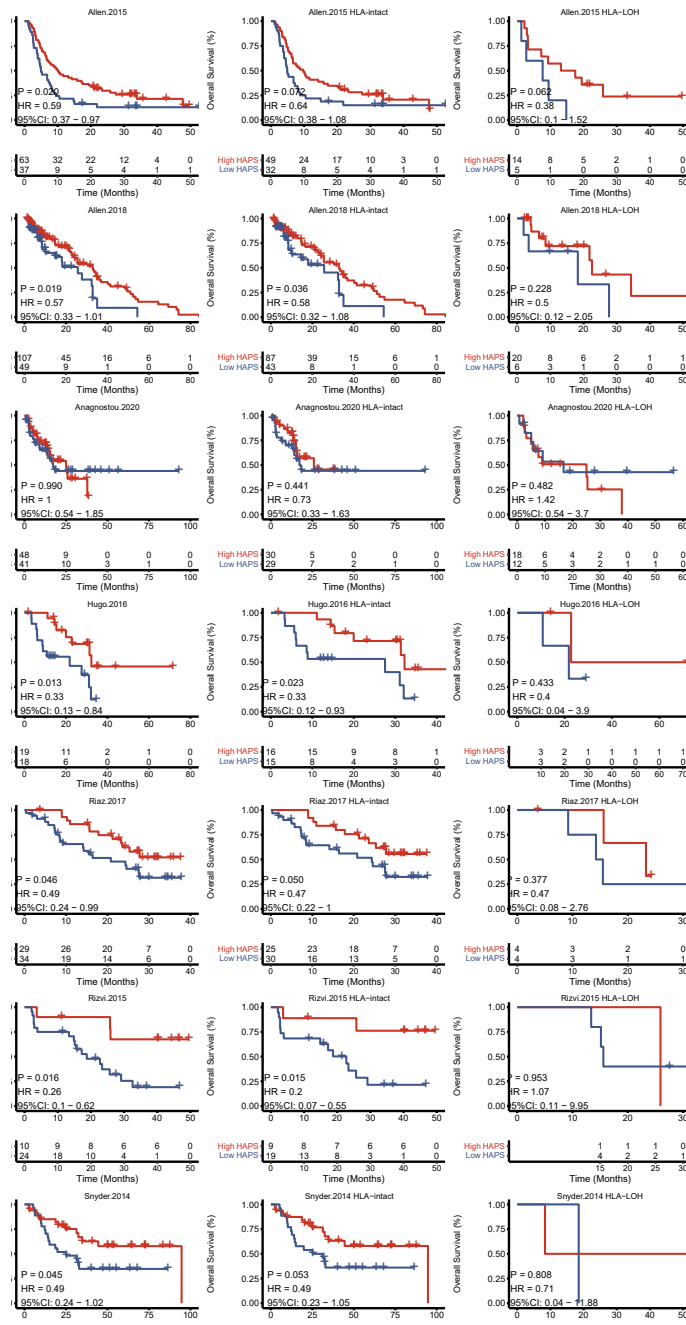

109

110 **Supplementary Figure 14. Patients stratified according to loss of heterozygosity (LOH) and**

111 ***HLA-I* Antigen Presentation Score (HAPS) in each cohort**

112 Differences in overall survival between high and low HAPS in all patients (left), patients with  
113 intact HLA (middle), and patients with HLA-LOH (right) in eight cohorts. Source data are  
114 provided as a Source Data file.

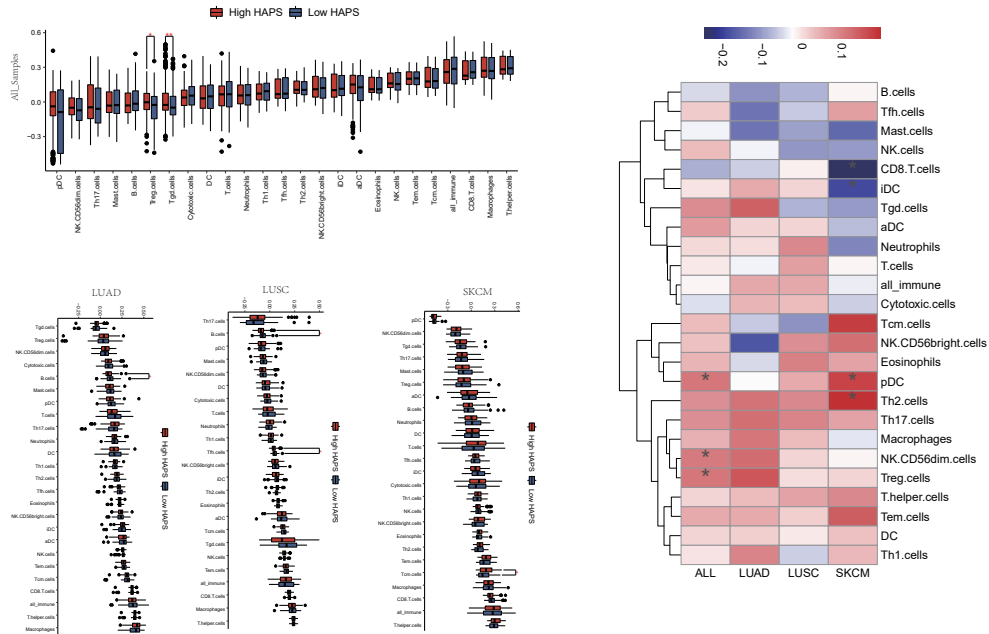

115

116 **Supplementary Figure 15. Immune cell subsets analyzed via single-sample gene set**

117 **enrichment analysis (ssGSEA) based on RNA-seq data**

118 Differences in specific immune cell subsets between high and low HAPS among all lung

119 adenocarcinoma (LUAD), lung squamous cell carcinoma (LUSC), and skin cutaneous melanoma

120 (SKCM) patients with RNA-seq data, respectively. Heatmap of specific immune cell subsets

121 among all LUAD, LUSC, and SKCM patients with RNA-seq data (N=455). Source data are

122 provided as a Source Data file.

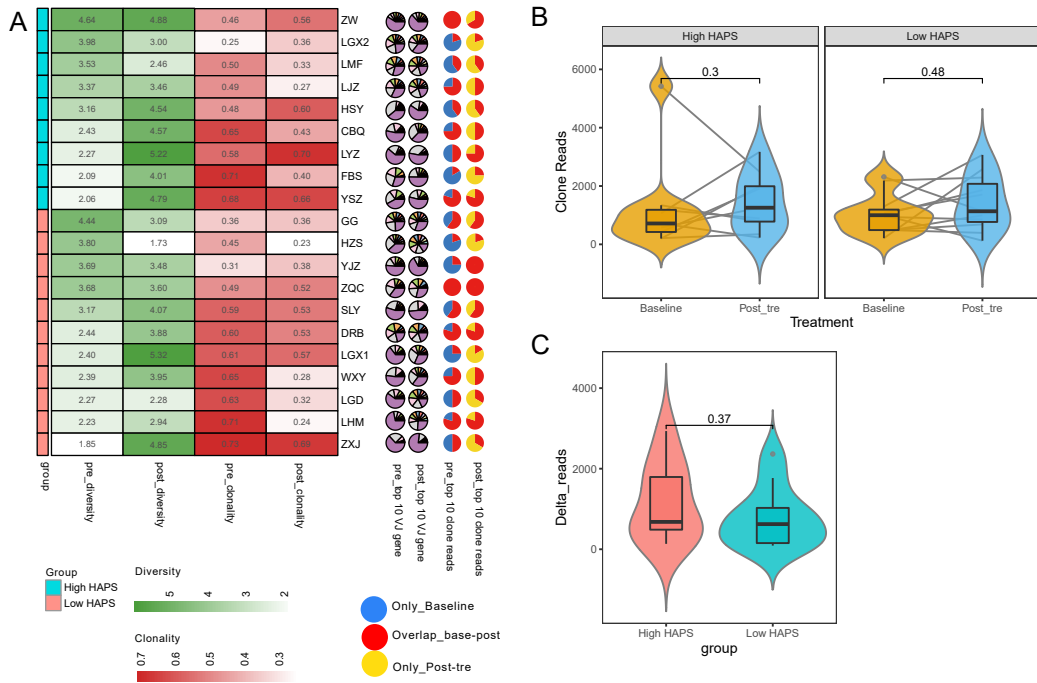

123

124 **Supplementary Figure 16. Relationship between *HLA-I* Antigen Presentation Score**

125 **(HAPS) and dynamic evolution of the TCR repertoire.**

126 This analysis is based on patients from the Wang-Blood cohort. **(A)** Individual changes in

127 diversity and clonality pre- and post-treatment. **(B-C)** Number of T cell receptor (TCR) clone

128 reads pre- and post-treatment in the high and low HAPS groups. Source data are provided as a

129 Source Data file.

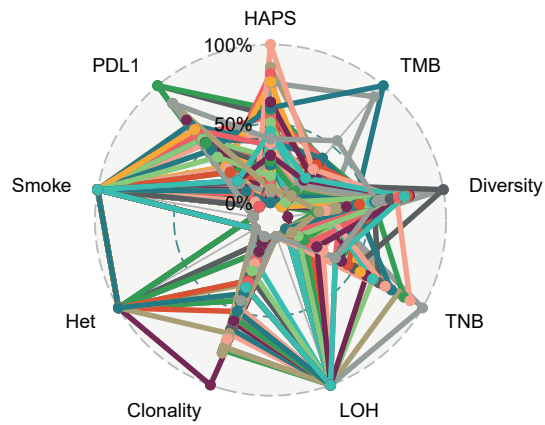

130

131 **Supplementary Figure 17. Varied predictive values of nine factors for individual patient.**

132 Each colored trajectory corresponds to a distinct patient, and the dots along this trajectory denote

133 the relative influence of each factor on the therapeutic response of that particular patient. Source

134 data are provided as a Source Data file.

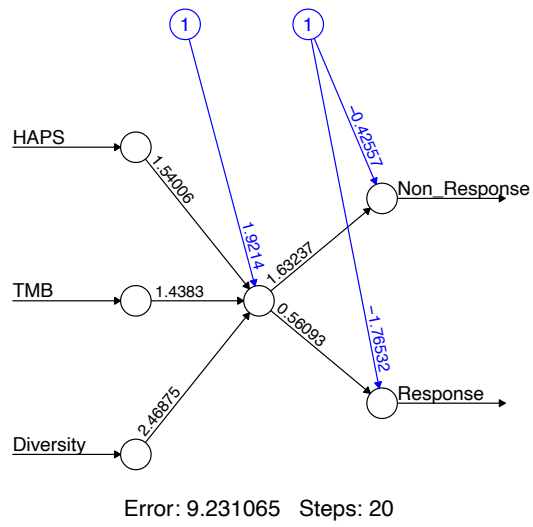

135

136 **Supplementary Figure 18. The architecture of the neural network model.**

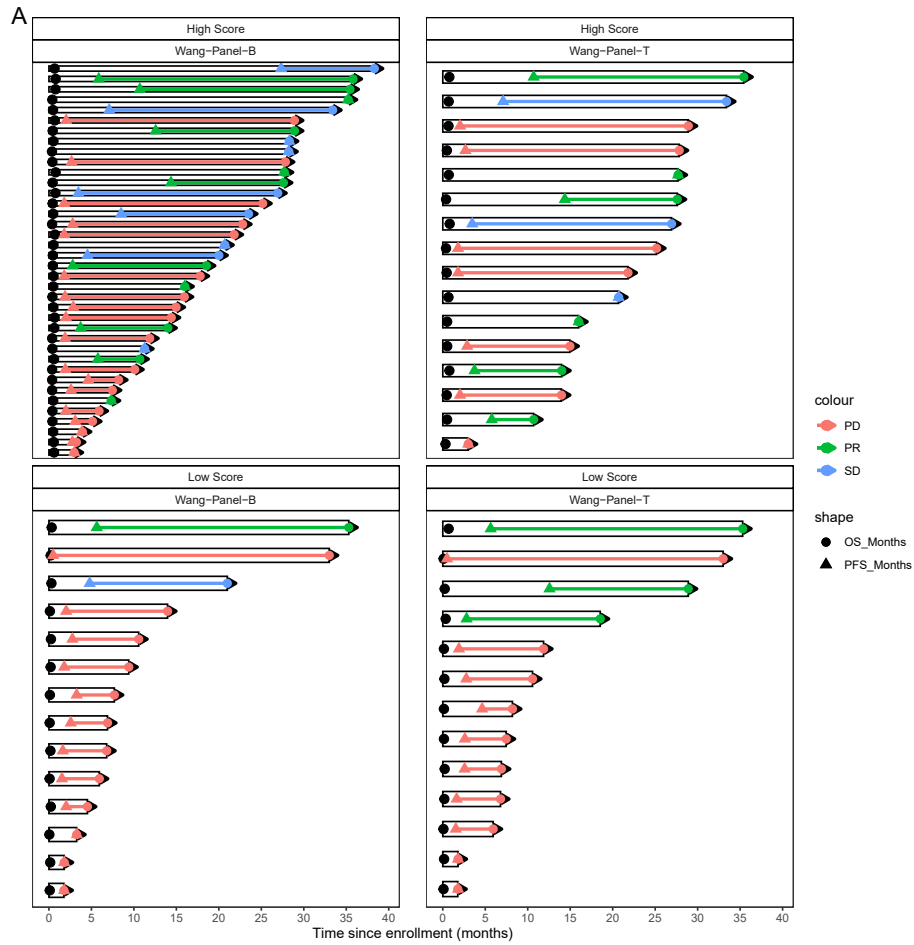

137

138 **Supplementary Figure 19. Clinical responses of individuals predicted by a neural network**

139 **model**

140 Swimming map exhibiting overall survival/progression-free survival months and progressive

141 disease/partial response/stable disease responses pre- and post-treatment in the Wang-Tissue and

142 Wang-Blood cohorts. Source data are provided as a Source Data file.
