# Supplementary material for: Assessment of human leukocyte antigen-based neoantigen presentation to determine pan-cancer response to immunotherapy
Source: PubMed Central journal article supplement (PMC10853168; doi:10.1038/s41467-024-45361-5), 2024-02-08
Supplement: 41467_2024_45361_MOESM3_ESM.pdf [file 41467_2024_45361_MOESM3_ESM.pdf]

## **Description of Additional Supplementary Files**

**File Name: Supplementary Data 1**

**Description:** Patient characteristics.

**File Name: Supplementary Data 2**

**Description:** Amino acid sequences of predicted neoantigens.

**File Name: Supplementary Data 3**

**Description:** Predictive value of HAPS in enrolled patients.

**File Name: Supplementary Data 4**

**Description:** Gene list of the NGS-based 1,021 panel

**File Name: Supplementary Data 5**

**Description:** Association of HAPS with response to immunotherapy stratified by HLA-LOH

**File Name: Supplementary Data 6**

**Description:** TME signature and function.

**File Name: Supplementary Data 7**

**Description:** Distribution of immune cells analyzed via ssGSEA.

**File Name: Supplementary Data 8**

**Description:** TCR and panel-based HAPS analysis of Wang-panel-T/B cohort.

**File Name: Supplementary Data 9**

**Description:** Data used in the neural network model.

**File Name: Supplementary Data 10**

**Description:** List of primer sequences used for PCR
