# Supplementary material for: Assessment of human leukocyte antigen-based neoantigen presentation to determine pan-cancer response to immunotherapy
Source: PubMed Central journal article supplement (PMC10853168; doi:10.1038/s41467-024-45361-5), 2024-02-08
Supplement: 41467_2024_45361_MOESM14_ESM.pdf [file 41467_2024_45361_MOESM14_ESM.pdf]

## Reporting Summary

Nature Portfolio wishes to improve the reproducibility of the work that we publish. This form provides structure for consistency and transparency in reporting. For further information on Nature Portfolio policies, see our [Editorial Policies](#) and the [Editorial Policy Checklist](#).

### Statistics

For all statistical analyses, confirm that the following items are present in the figure legend, table legend, main text, or Methods section.

n/a | Confirmed

- |                                     |                                     |                                                                                                                                                                                                                                                            |
|-------------------------------------|-------------------------------------|------------------------------------------------------------------------------------------------------------------------------------------------------------------------------------------------------------------------------------------------------------|
| <input type="checkbox"/>            | <input checked="" type="checkbox"/> | The exact sample size ( $n$ ) for each experimental group/condition, given as a discrete number and unit of measurement                                                                                                                                    |
| <input type="checkbox"/>            | <input checked="" type="checkbox"/> | A statement on whether measurements were taken from distinct samples or whether the same sample was measured repeatedly                                                                                                                                    |
| <input type="checkbox"/>            | <input checked="" type="checkbox"/> | The statistical test(s) used AND whether they are one- or two-sided<br><i>Only common tests should be described solely by name; describe more complex techniques in the Methods section.</i>                                                               |
| <input type="checkbox"/>            | <input checked="" type="checkbox"/> | A description of all covariates tested                                                                                                                                                                                                                     |
| <input type="checkbox"/>            | <input checked="" type="checkbox"/> | A description of any assumptions or corrections, such as tests of normality and adjustment for multiple comparisons                                                                                                                                        |
| <input type="checkbox"/>            | <input checked="" type="checkbox"/> | A full description of the statistical parameters including central tendency (e.g. means) or other basic estimates (e.g. regression coefficient) AND variation (e.g. standard deviation) or associated estimates of uncertainty (e.g. confidence intervals) |
| <input type="checkbox"/>            | <input checked="" type="checkbox"/> | For null hypothesis testing, the test statistic (e.g. $F$ , $t$ , $r$ ) with confidence intervals, effect sizes, degrees of freedom and $P$ value noted<br><i>Give <math>P</math> values as exact values whenever suitable.</i>                            |
| <input checked="" type="checkbox"/> | <input type="checkbox"/>            | For Bayesian analysis, information on the choice of priors and Markov chain Monte Carlo settings                                                                                                                                                           |
| <input checked="" type="checkbox"/> | <input type="checkbox"/>            | For hierarchical and complex designs, identification of the appropriate level for tests and full reporting of outcomes                                                                                                                                     |
| <input type="checkbox"/>            | <input checked="" type="checkbox"/> | Estimates of effect sizes (e.g. Cohen's $d$ , Pearson's $r$ ), indicating how they were calculated                                                                                                                                                         |

*Our web collection on [statistics for biologists](#) contains articles on many of the points above.*

### Software and code

Policy information about [availability of computer code](#)

Data collection

Data analysis

For manuscripts utilizing custom algorithms or software that are central to the research but not yet described in published literature, software must be made available to editors and reviewers. We strongly encourage code deposition in a community repository (e.g. GitHub). See the Nature Portfolio [guidelines for submitting code & software](#) for further information.

### Data

Policy information about [availability of data](#)

All manuscripts must include a [data availability statement](#). This statement should provide the following information, where applicable:

- Accession codes, unique identifiers, or web links for publicly available datasets
- A description of any restrictions on data availability
- For clinical datasets or third party data, please ensure that the statement adheres to our [policy](#)

All data needed to evaluate the conclusions of the current study are present in the manuscript and/or the Supplementary Materials. The source code and data associated with this paper are available at <https://github.com/zxl2014swjx/HAPS.git>. Whole-exome sequencing, T-cell repertoire sequencing and panel sequencing data have been deposited in Genome Sequence Archive under accession code PRJCA018167.

## Research involving human participants, their data, or biological material

Policy information about studies with [human participants or human data](#). See also policy information about [sex, gender \(identity/presentation\), and sexual orientation](#) and [race, ethnicity and racism](#).

|                                                                    |                                                                                                                                                                                                                                                                                                                                                                                                                                             |
|--------------------------------------------------------------------|---------------------------------------------------------------------------------------------------------------------------------------------------------------------------------------------------------------------------------------------------------------------------------------------------------------------------------------------------------------------------------------------------------------------------------------------|
| Reporting on sex and gender                                        | This study did not include gender as a factor for analysis, as there is currently no research evidence to suggest that gender differences have an impact on the presentation ability of HLA antigens.                                                                                                                                                                                                                                       |
| Reporting on race, ethnicity, or other socially relevant groupings | The patients included in this article are based on publicly available datasets that have been published, as well as patients enrolled at our center, and do not involve race, ethnicity, or other socially relevant groupings.                                                                                                                                                                                                              |
| Population characteristics                                         | The participant cohort in our study was characterized by a consistency in their past and current diagnoses and treatment categories.                                                                                                                                                                                                                                                                                                        |
| Recruitment                                                        | The present study consists of patients from public datasets and patients from our center. The inclusion of patients from public datasets depended on which studies provided publicly available data that could be analyzed. The inclusion of patients from our center comprised all patients who received immunotherapy between March 14, 2017 and May 2, 2018. There is no self-selection bias or other biases that may impact the results |
| Ethics oversight                                                   | This study was approved by the ethics committees of the National Cancer Center/Cancer Hospital, Chinese Academy of [Medical Sciences, and the Peking Union Medical College (NCC2016JZ-03 and NCC2018-092). All enrolled patients provided written informed consent.                                                                                                                                                                         |

Note that full information on the approval of the study protocol must also be provided in the manuscript.

## Field-specific reporting

Please select the one below that is the best fit for your research. If you are not sure, read the appropriate sections before making your selection.

Life sciences       Behavioural & social sciences       Ecological, evolutionary & environmental sciences

For a reference copy of the document with all sections, see [nature.com/documents/nr-reporting-summary-flat.pdf](https://www.nature.com/documents/nr-reporting-summary-flat.pdf)

## Life sciences study design

All studies must disclose on these points even when the disclosure is negative.

|                 |                                                                                                                                                                                                                                                                                                                                                                                                       |
|-----------------|-------------------------------------------------------------------------------------------------------------------------------------------------------------------------------------------------------------------------------------------------------------------------------------------------------------------------------------------------------------------------------------------------------|
| Sample size     | No sample-size calculation was performed. The present study included 792 patients from public datasets and 93 patients from our center. The inclusion of patients from public datasets depended on which studies provided publicly available data that could be analyzed. The inclusion of patients from our center comprised all patients who received immunotherapy during a certain period of time |
| Data exclusions | no data were excluded from the analyses                                                                                                                                                                                                                                                                                                                                                               |
| Replication     | Based on the data and methods (code) provided in this study, the same research results can be obtained.                                                                                                                                                                                                                                                                                               |
| Randomization   | In this study, the dataset was divided into training set and validation set based on its sources. The training set included an Asian patient cohort and a Caucasian patient cohort, while other datasets were used as the validation set.                                                                                                                                                             |
| Blinding        | The study was conducted retrospectively, all of the data analyzed was readily available and visible to the researchers during the analysis process                                                                                                                                                                                                                                                    |

## Reporting for specific materials, systems and methods

We require information from authors about some types of materials, experimental systems and methods used in many studies. Here, indicate whether each material, system or method listed is relevant to your study. If you are not sure if a list item applies to your research, read the appropriate section before selecting a response.

## Materials &amp; experimental systems

|                                     |                                                        |
|-------------------------------------|--------------------------------------------------------|
| n/a                                 | Involvement in the study                               |
| <input type="checkbox"/>            | <input checked="" type="checkbox"/> Antibodies         |
| <input checked="" type="checkbox"/> | <input type="checkbox"/> Eukaryotic cell lines         |
| <input checked="" type="checkbox"/> | <input type="checkbox"/> Palaeontology and archaeology |
| <input checked="" type="checkbox"/> | <input type="checkbox"/> Animals and other organisms   |
| <input type="checkbox"/>            | <input checked="" type="checkbox"/> Clinical data      |
| <input checked="" type="checkbox"/> | <input type="checkbox"/> Dual use research of concern  |
| <input checked="" type="checkbox"/> | <input type="checkbox"/> Plants                        |

## Methods

|                                     |                                                    |
|-------------------------------------|----------------------------------------------------|
| n/a                                 | Involvement in the study                           |
| <input checked="" type="checkbox"/> | <input type="checkbox"/> ChIP-seq                  |
| <input type="checkbox"/>            | <input checked="" type="checkbox"/> Flow cytometry |
| <input checked="" type="checkbox"/> | <input type="checkbox"/> MRI-based neuroimaging    |

## Antibodies

|                 |                                                                                                                                                                                                                                                                                                                                    |
|-----------------|------------------------------------------------------------------------------------------------------------------------------------------------------------------------------------------------------------------------------------------------------------------------------------------------------------------------------------|
| Antibodies used | The specific antibodies used, sourced from eBioscience, included CD3-eFluor 450 (OKT3) (catalog: 48-0037-42), CD8-APC (RPA-T8) (catalog: 17-0088-42), and CD279 (PD-1)-PE (MIH4) (catalog: 12-9969-42). CD8-FITC (T8) was purchased from MBL (catalog: K0227-4). 4-1BB-APC (4B4-1) was purchased from biolegend (catalog: 309810). |
| Validation      | The specific antibodies used, sourced from eBioscience, included CD3-eFluor 450 (OKT3) (catalog: 48-0037-42), CD8-APC (RPA-T8) (catalog: 17-0088-42), and CD279 (PD-1)-PE (MIH4) (catalog: 12-9969-42). CD8-FITC (T8) was purchased from MBL (catalog: K0227-4). 4-1BB-APC (4B4-1) was purchased from biolegend (catalog: 309810). |

## Clinical data

Policy information about [clinical studies](#)

All manuscripts should comply with the ICMJE [guidelines for publication of clinical research](#) and a completed [CONSORT checklist](#) must be included with all submissions.

|                             |                                                                                                                                                                                                                                                                                                                                                                                                                                                                                                                                                               |
|-----------------------------|---------------------------------------------------------------------------------------------------------------------------------------------------------------------------------------------------------------------------------------------------------------------------------------------------------------------------------------------------------------------------------------------------------------------------------------------------------------------------------------------------------------------------------------------------------------|
| Clinical trial registration | Na                                                                                                                                                                                                                                                                                                                                                                                                                                                                                                                                                            |
| Study protocol              | The study protocol is outlined in the manuscript's methodology section.                                                                                                                                                                                                                                                                                                                                                                                                                                                                                       |
| Data collection             | All patients from our center were enrolled and received treatment with anti-PD-(L)1 monotherapy between March 14, 2017 and May 2, 2018.                                                                                                                                                                                                                                                                                                                                                                                                                       |
| Outcomes                    | The efficacy was determined by the Response Evaluation Criteria in Solid Tumors (RECIST) version 1.1, including CR, PR, SD, and progressive disease. Disease control indicated the patients who achieved disease control (i.e., CR, PR, or SD according to RECIST version 1.1). PFS was defined as the time from the start of immunotherapy until either objective disease progression (assessed by an investigator using RECIST version 1.1) or death from any cause. OS was defined as the time from the start of immunotherapy until death from any cause. |

## Plants

|                       |    |
|-----------------------|----|
| Seed stocks           | Na |
| Novel plant genotypes | Na |
| Authentication        | Na |

## Flow Cytometry

## Plots

Confirm that:

- The axis labels state the marker and fluorochrome used (e.g. CD4-FITC).
- The axis scales are clearly visible. Include numbers along axes only for bottom left plot of group (a 'group' is an analysis of identical markers).
- All plots are contour plots with outliers or pseudocolor plots.
- A numerical value for number of cells or percentage (with statistics) is provided.

## Methodology

Sample preparation

PBMCs were isolated from 10 ml of fresh peripheral blood containing an anticoagulant by density gradient centrifugation using LymphoPrep (Progen, Heidelberg, Germany).

Instrument

BD FACSAria II

Software

Flowjo

Cell population abundance

The number of sorted PD-1+CD8+T cells was approximately  $10^5$  in one sample.

Gating strategy

Single mononuclear cells were selected by FSC and SSC. Within the single cells, live cells were gated by a live/dead cell stain. Subsequently, anti-CD8-APC and anti-PD-1-PE positive were selected.

Tick this box to confirm that a figure exemplifying the gating strategy is provided in the Supplementary Information.
